# Supplementary material for: Elucidating the complexity of transboundary functional corridor networks for Asian Elephants Elephas maximus through ecological and genetic insights in Asia
Source: Research Square preprint supplement (doi:10.21203/rs.3.rs-6993826/v1), 2025-07-02
Supplement: Supplementary file 1 [file 70fda2f0d06e0db2f1c7df64.docx]

**Supplementary Information**


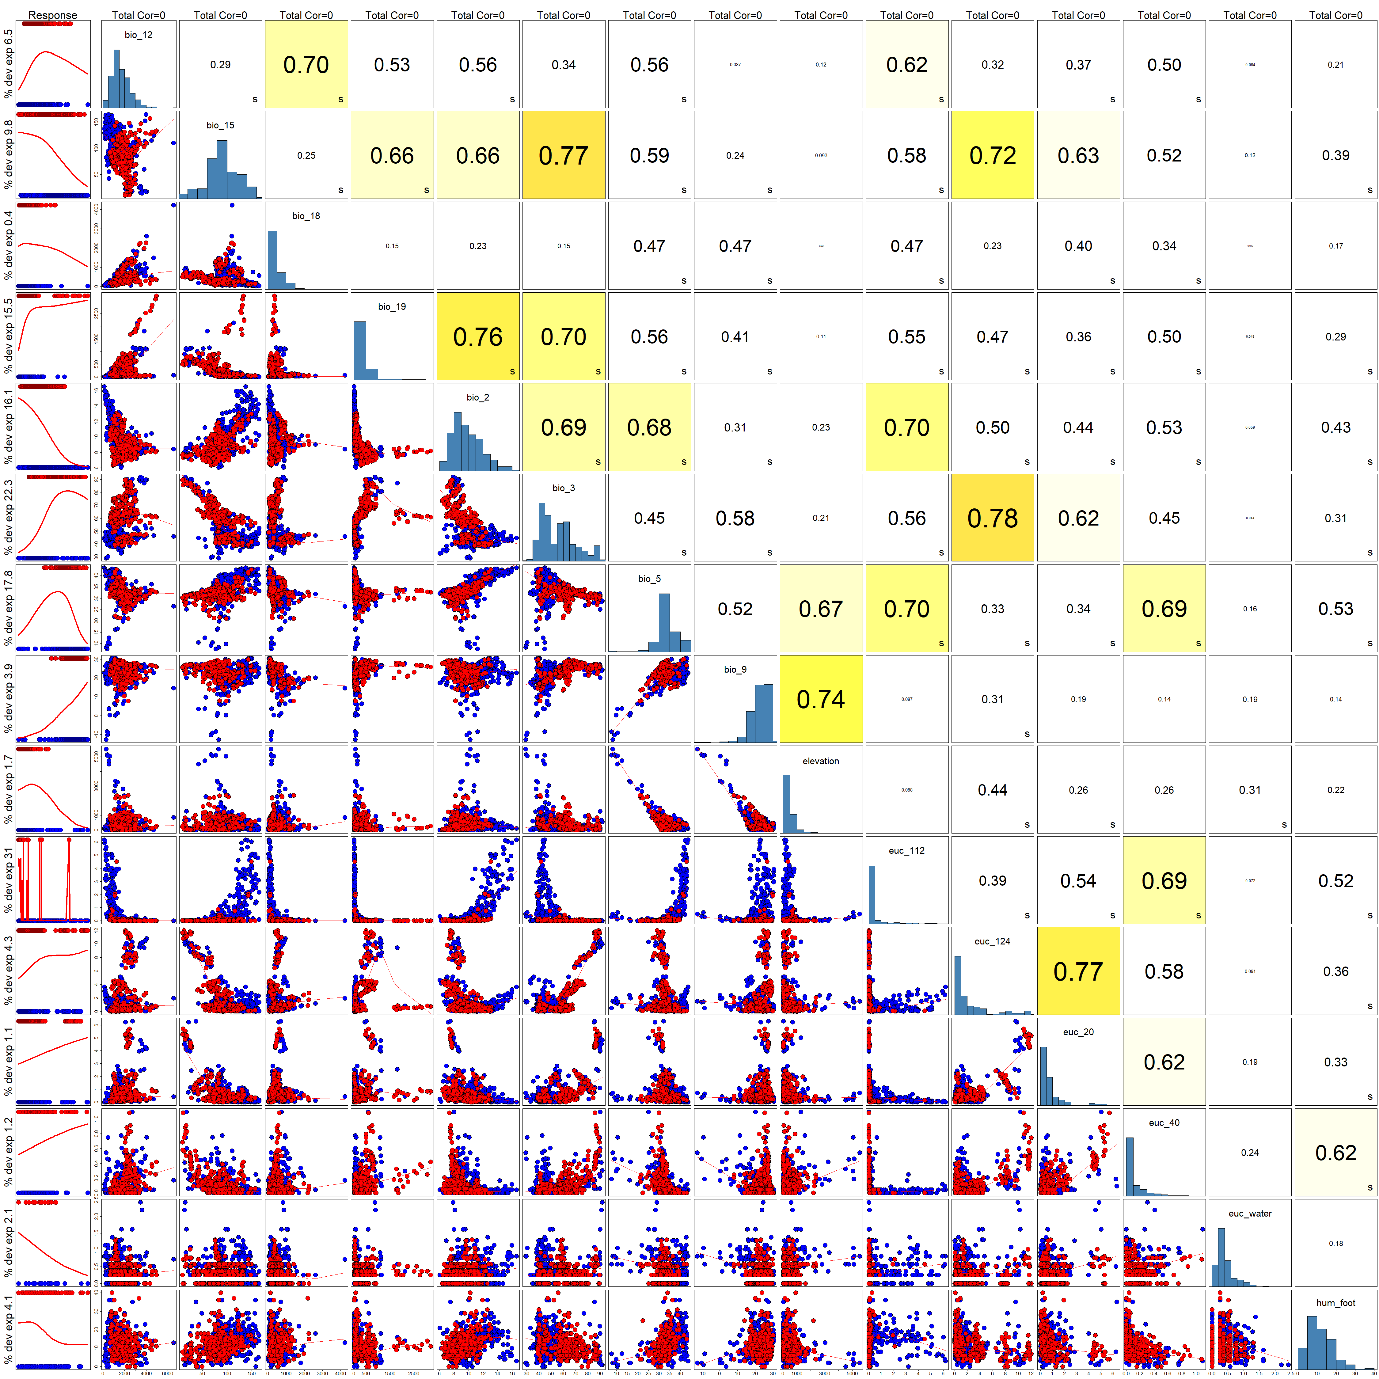


**F****ig. S1** The correlation between the covariates chosen for final model forAsian elephants. The Pearson correlation coefficient is the primarily used here. However, if the Spearman or Kendall correlation coefficient exceeds the Pearson correlation coefficient, an "s" or "k" will be displayed in the bottom-right corner of the variable box.


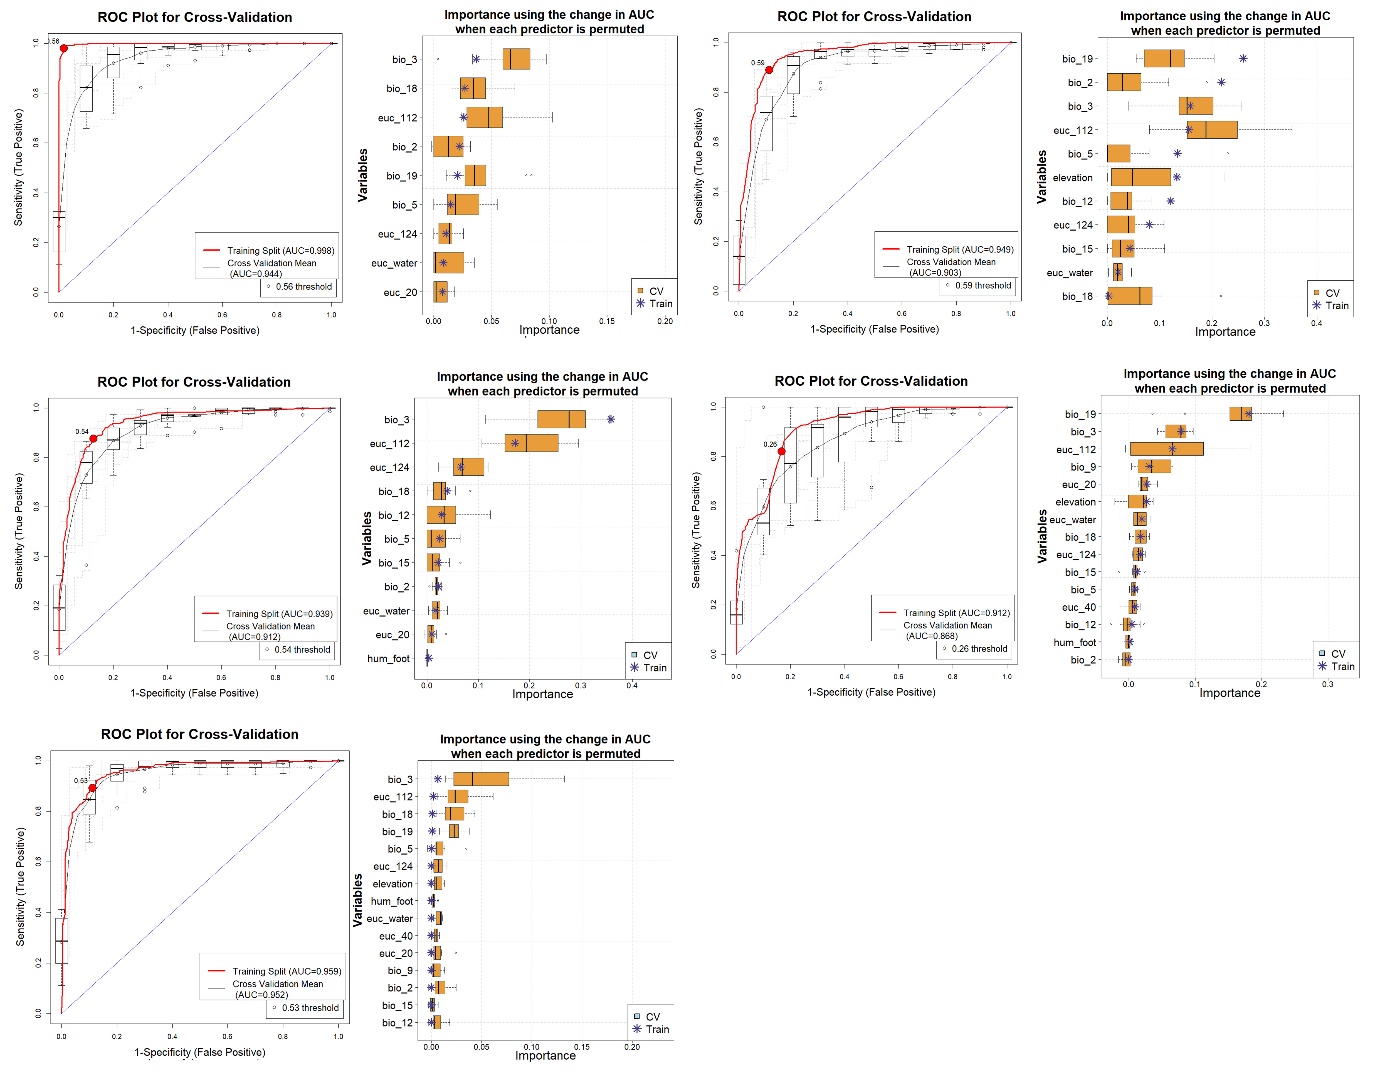


**Fig. S2** Model evaluation plots depicting the average training ROC for both training and cross-validation (CV), along with the predictors selected by the model across replicate runs under five different models. (A) Boosted Regression Tree, (b) Generalized Linear Model (GLM) (C) Multivariate Adaptive Regression Splines (MARS), (D) Maximum Entropy (MaxEnt) and (E) Random Forest.


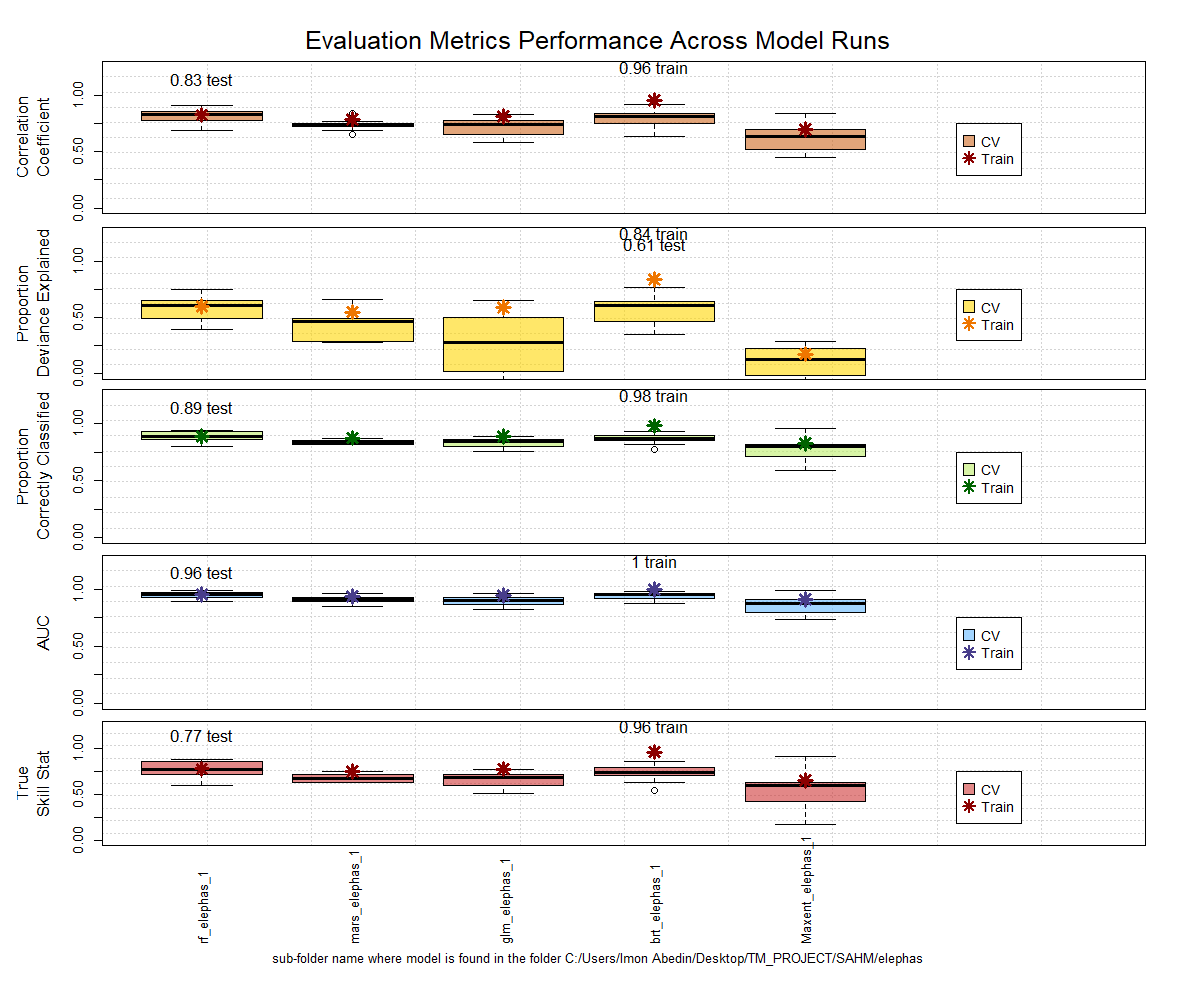


**Fig. S3** Evaluation Matrix performance across model runs for Asian elephants. Brown - represents the correlation coefficient among the 5 different models. Yellow - represents the proportion of deviance explained; Green - represents the Proportion of correctly classified; Blue - represents Area under curve (AUC) and Pink - represents true skill statistics.


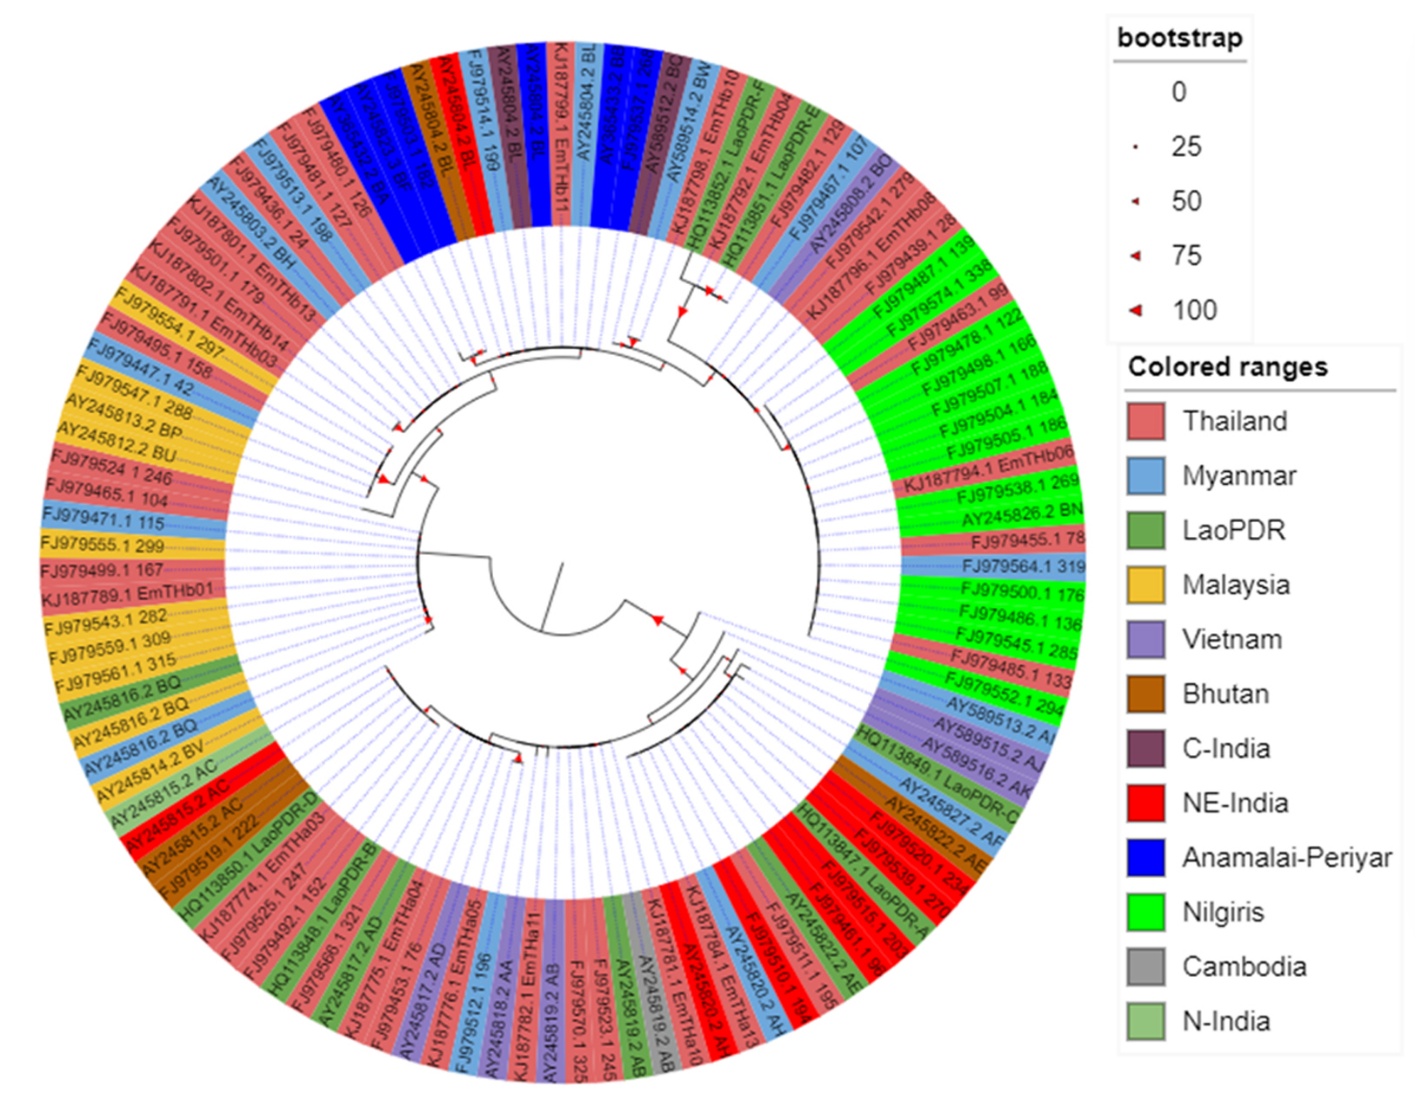


**Fig. S4** Maximum Likelihood phylogenetic tree of the Asian elephant using HKY+G+I model in RAxML v8 software. NE-India=Northeast India, C-India=Central India and N-India=Northern India.


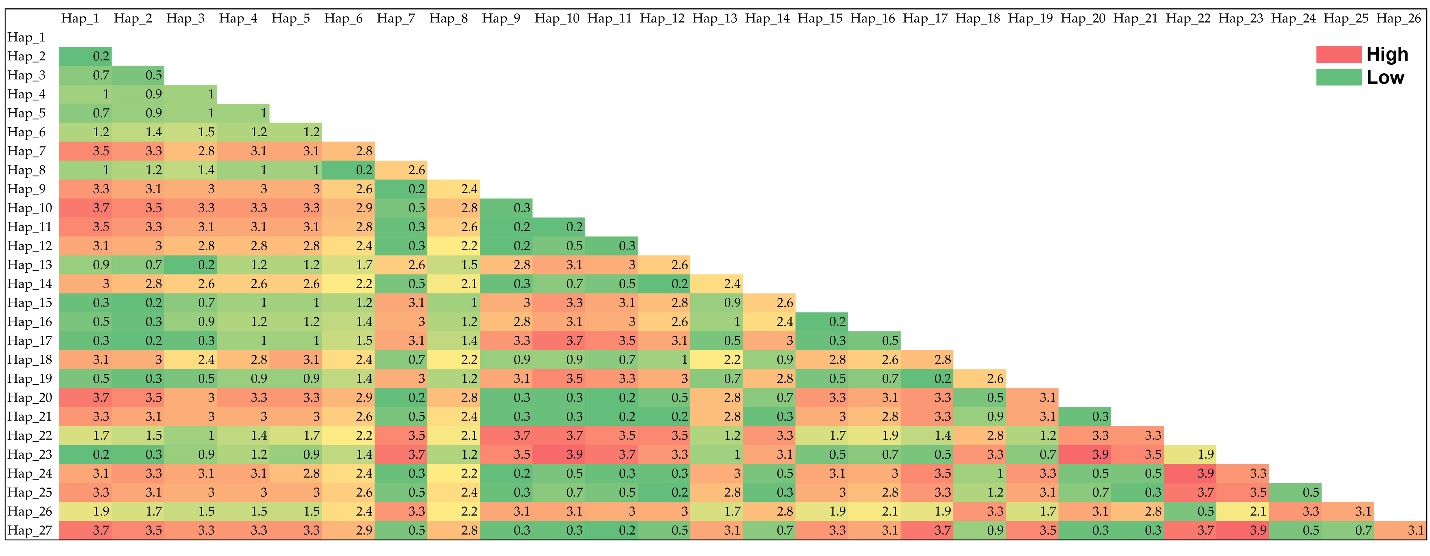


**Fig. S5** Genetic distance estimated for all the generated haplotypes of Asian elephants.

**Table S1** Number of occurrences of Asian elephants in different range countries (Source: GeoCAT Secondary Data Repository).

| **Country** | **No. of Occurrences** |
| --- | --- |
| Bhutan (BTN) | 10 |
| India (IND) | 375 |
| Malaysia (MYS) | 91 |
| Indonesia (IDN) | 11 |
| Nepal (NPL) | 22 |
| Sri Lanka (LKA) | 226 |
| Thailand (THA) | 154 |
| Bangladesh (BGD) | 2 |

**Table S2** List of sequences used in this study including accession numbers, geographic origin and references. NE-India=Northeast India, C-India=Central India and N-India=Northern India.

| **Sl. No.** | **NCBI Accession No.** | **Origin** | **References** |
| --- | --- | --- | --- |
| 1 | AY245803.2 | Myanmar | Fernando et al. 2003 |
| 2 | AY245804.2 | Anamalai-Periyar | Fernando et al. 2003 |
| 3 | AY245804.2 | Bhutan | Fernando et al. 2003 |
| 4 | AY245804.2 | C-India | Fernando et al. 2003 |
| 5 | AY245804.2 | Myanmar | Fernando et al. 2003 |
| 6 | AY245804.2 | NE-India | Fernando et al. 2003 |
| 7 | AY245808.2 | Vietnam | Fernando et al. 2003 |
| 8 | AY245812.2 | Malaysia | Fernando et al. 2003 |
| 9 | AY245813.2 | Malaysia | Fernando et al. 2003 |
| 10 | AY245814.2 | Malaysia | Fernando et al. 2003 |
| 11 | AY245815.2 | Bhutan | Fernando et al. 2003 |
| 12 | AY245815.2 | NE-India | Fernando et al. 2003 |
| 13 | AY245815.2 | N-India | Fernando et al. 2003 |
| 14 | AY245816.2 | LaoPDR | Fernando et al. 2003 |
| 15 | AY245816.2 | Malaysia | Fernando et al. 2003 |
| 16 | AY245816.2 | Myanmar | Fernando et al. 2003 |
| 17 | AY245817.2 | LaoPDR | Fernando et al. 2003 |
| 18 | AY245817.2 | Vietnam | Fernando et al. 2003 |
| 19 | AY245818.2 | Vietnam | Fernando et al. 2003 |
| 20 | AY245819.2 | Cambodia | Fernando et al. 2003 |
| 21 | AY245819.2 | LaoPDR | Fernando et al. 2003 |
| 22 | AY245819.2 | Vietnam | Fernando et al. 2003 |
| 23 | AY245820.2 | Myanmar | Fernando et al. 2003 |
| 24 | AY245820.2 | NE-India | Fernando et al. 2003 |
| 25 | AY245822.2 | Bhutan | Fernando et al. 2003 |
| 26 | AY245822.2 | LaoPDR | Fernando et al. 2003 |
| 27 | AY245823.3 | Anamalai-Periyar | Fernando et al. 2003 |
| 28 | AY245826.2 | Nilgiris | Fernando et al. 2003 |
| 29 | AY245827.2 | Myanmar | Fernando et al. 2003 |
| 30 | AY365432.2 | Anamalai-Periyar | Vidya et al. 2009 |
| 31 | AY365433.2 | Anamalai-Periyar | Vidya et al. 2009 |
| 32 | AY589512.2 | C-India | Vidya et al. 2009 |
| 33 | AY589513.2 | Myanmar | Vidya et al. 2009 |
| 34 | AY589514.2 | Myanmar | Vidya et al. 2009 |
| 35 | AY589515.2 | Vietnam | Vidya et al. 2007 |
| 36 | AY589516.2 | Vietnam | Vidya et al. 2007 |
| 37 | FJ979436.1 | Thailand | Lei et al. 2011 |
| 38 | FJ979439.1 | Thailand | Lei et al. 2011 |
| 39 | FJ979447.1 | Myanmar | Lei et al. 2011 |
| 40 | FJ979453.1 | Thailand | Lei et al. 2011 |
| 41 | FJ979455.1 | Thailand | Lei et al. 2011 |
| 42 | FJ979461.1 | India | Lei et al. 2011 |
| 43 | FJ979463.1 | Thailand | Lei et al. 2011 |
| 44 | FJ979465.1 | Thailand | Lei et al. 2011 |
| 45 | FJ979467.1 | Myanmar | Lei et al. 2011 |
| 46 | FJ979471.1 | Myanmar | Lei et al. 2011 |
| 47 | FJ979478.1 | India | Lei et al. 2011 |
| 48 | FJ979480.1 | Thailand | Lei et al. 2011 |
| 49 | FJ979481.1 | Thailand | Lei et al. 2011 |
| 50 | FJ979482.1 | Thailand | Lei et al. 2011 |
| 51 | FJ979485.1 | Thailand | Lei et al. 2011 |
| 52 | FJ979486.1 | India | Lei et al. 2011 |
| 53 | FJ979487.1 | India | Lei et al. 2011 |
| 54 | FJ979492.1 | Thailand | Lei et al. 2011 |
| 55 | FJ979495.1 | Thailand | Lei et al. 2011 |
| 56 | FJ979498.1 | India | Lei et al. 2011 |
| 57 | FJ979499.1 | Thailand | Lei et al. 2011 |
| 58 | FJ979500.1 | India | Lei et al. 2011 |
| 59 | FJ979501.1 | Thailand | Lei et al. 2011 |
| 60 | FJ979503.1 | India | Lei et al. 2011 |
| 61 | FJ979504.1 | India | Lei et al. 2011 |
| 62 | FJ979505.1 | India | Lei et al. 2011 |
| 63 | FJ979507.1 | India | Lei et al. 2011 |
| 64 | FJ979510.1 | India | Lei et al. 2011 |
| 65 | FJ979511.1 | Thailand | Lei et al. 2011 |
| 66 | FJ979512.1 | Myanmar | Lei et al. 2011 |
| 67 | FJ979513.1 | Myanmar | Lei et al. 2011 |
| 68 | FJ979514.1 | Myanmar | Lei et al. 2011 |
| 69 | FJ979515.1 | India | Lei et al. 2011 |
| 70 | FJ979519.1 | Bhutan | Lei et al. 2011 |
| 71 | FJ979520.1 | India | Lei et al. 2011 |
| 72 | FJ979523.1 | Thailand | Lei et al. 2011 |
| 73 | FJ979524.1 | Thailand | Lei et al. 2011 |
| 74 | FJ979525.1 | Thailand | Lei et al. 2011 |
| 75 | FJ979537.1 | India | Lei et al. 2011 |
| 76 | FJ979538.1 | India | Lei et al. 2011 |
| 77 | FJ979539.1 | India | Lei et al. 2011 |
| 78 | FJ979542.1 | Thailand | Lei et al. 2011 |
| 79 | FJ979543.1 | Malaysia | Lei et al. 2011 |
| 80 | FJ979545.1 | India | Lei et al. 2011 |
| 81 | FJ979547.1 | Malaysia | Lei et al. 2011 |
| 82 | FJ979552.1 | India | Lei et al. 2011 |
| 83 | FJ979554.1 | Malaysia | Lei et al. 2011 |
| 84 | FJ979555.1 | Malaysia | Lei et al. 2011 |
| 85 | FJ979559.1 | Malaysia | Lei et al. 2011 |
| 86 | FJ979561.1 | Malaysia | Lei et al. 2011 |
| 87 | FJ979564.1 | Myanmar | Lei et al. 2011 |
| 88 | FJ979566.1 | Thailand | Lei et al. 2011 |
| 89 | FJ979570.1 | Thailand | Lei et al. 2011 |
| 90 | FJ979574.1 | India | Lei et al. 2011 |
| 91 | HQ113847.1 | LaoPDR | Ahlering et al. 2011 |
| 92 | HQ113848.1 | LaoPDR | Ahlering et al. 2011 |
| 93 | HQ113849.1 | LaoPDR] | Ahlering et al. 2011 |
| 94 | HQ113850.1 | LaoPDR | Ahlering et al. 2011 |
| 95 | HQ113851.1 | LaoPDR | Ahlering et al. 2011 |
| 96 | HQ113852.1 | LaoPDR] | Ahlering et al. 2011 |
| 97 | KJ187774.1 | Thailand | Thitaram et al. 2015 |
| 98 | KJ187775.1 | Thailand | Thitaram et al. 2015 |
| 99 | KJ187776.1 | Thailand | Thitaram et al. 2015 |
| 100 | KJ187781.1 | Thailand | Thitaram et al. 2015 |
| 101 | KJ187782.1 | Thailand | Thitaram et al. 2015 |
| 102 | KJ187784.1 | Thailand | Thitaram et al. 2015 |
| 103 | KJ187789.1 | Thailand | Thitaram et al. 2015 |
| 104 | KJ187791.1 | Thailand | Thitaram et al. 2015 |
| 105 | KJ187792.1 | Thailand | Thitaram et al. 2015 |
| 106 | KJ187794.1 | Thailand | Thitaram et al. 2015 |
| 107 | KJ187796.1 | Thailand | Thitaram et al. 2015 |
| 108 | KJ187798.1 | Thailand | Thitaram et al. 2015 |
| 109 | KJ187799.1 | Thailand | Thitaram et al. 2015 |
| 110 | KJ187801.1 | Thailand | Thitaram et al. 2015 |
| 111 | KJ187802.1 | Thailand | Thitaram et al. 2015 |

**Table S3** List of haplotypes and their geographic locality.NE-India=Northeast India, C-India=Central India and N-India=Northern India.

|  | Myanmar | Bhutan | NE_India | C_India | Anamalai_Periyar | Vietnam | Malaysia | N_India | LaoPDR | Cambodia | Nilgiris | Thailand |
| --- | --- | --- | --- | --- | --- | --- | --- | --- | --- | --- | --- | --- |
| Hap_1 | 2 | 0 | 0 | 0 | 0 | 0 | 0 | 0 | 0 | 0 | 0 | 4 |
| Hap_2 | 2 | 1 | 1 | 1 | 3 | 0 | 0 | 0 | 0 | 0 | 0 | 1 |
| Hap_3 | 1 | 0 | 0 | 0 | 0 | 1 | 0 | 0 | 0 | 0 | 0 | 3 |
| Hap_4 | 0 | 0 | 0 | 0 | 0 | 0 | 1 | 0 | 0 | 0 | 0 | 0 |
| Hap_5 | 1 | 0 | 0 | 0 | 0 | 0 | 3 | 0 | 0 | 0 | 0 | 2 |
| Hap_6 | 0 | 0 | 0 | 0 | 0 | 0 | 1 | 0 | 0 | 0 | 0 | 0 |
| Hap_7 | 0 | 2 | 1 | 0 | 0 | 0 | 0 | 1 | 1 | 0 | 0 | 3 |
| Hap_8 | 2 | 0 | 0 | 0 | 0 | 0 | 5 | 0 | 1 | 0 | 0 | 4 |
| Hap_9 | 0 | 0 | 0 | 0 | 0 | 1 | 0 | 0 | 2 | 0 | 0 | 3 |
| Hap_10 | 0 | 0 | 0 | 0 | 0 | 1 | 0 | 0 | 0 | 0 | 0 | 0 |
| Hap_11 | 0 | 0 | 0 | 0 | 0 | 1 | 0 | 0 | 1 | 1 | 0 | 3 |
| Hap_12 | 1 | 1 | 6 | 0 | 0 | 0 | 0 | 0 | 2 | 0 | 0 | 2 |
| Hap_13 | 1 | 0 | 0 | 0 | 0 | 0 | 0 | 0 | 0 | 0 | 13 | 4 |
| Hap_14 | 1 | 0 | 0 | 0 | 0 | 0 | 0 | 0 | 0 | 0 | 0 | 0 |
| Hap_15 | 0 | 0 | 0 | 0 | 2 | 0 | 0 | 0 | 0 | 0 | 0 | 0 |
| Hap_16 | 0 | 0 | 0 | 0 | 1 | 0 | 0 | 0 | 0 | 0 | 0 | 0 |
| Hap_17 | 0 | 0 | 0 | 1 | 0 | 0 | 0 | 0 | 0 | 0 | 0 | 0 |
| Hap_18 | 1 | 0 | 0 | 0 | 0 | 0 | 0 | 0 | 0 | 0 | 0 | 0 |
| Hap_19 | 1 | 0 | 0 | 0 | 0 | 0 | 0 | 0 | 0 | 0 | 0 | 1 |
| Hap_20 | 0 | 0 | 0 | 0 | 0 | 1 | 0 | 0 | 0 | 0 | 0 | 0 |
| Hap_21 | 0 | 0 | 0 | 0 | 0 | 1 | 0 | 0 | 0 | 0 | 0 | 0 |
| Hap_22 | 0 | 0 | 0 | 0 | 0 | 0 | 0 | 0 | 1 | 0 | 0 | 2 |
| Hap_23 | 0 | 0 | 0 | 0 | 0 | 0 | 0 | 0 | 0 | 0 | 0 | 2 |
| Hap_24 | 1 | 0 | 0 | 0 | 0 | 0 | 0 | 0 | 0 | 0 | 0 | 1 |
| Hap_25 | 0 | 0 | 0 | 0 | 0 | 0 | 0 | 0 | 1 | 0 | 0 | 0 |
| Hap_26 | 0 | 0 | 0 | 0 | 0 | 0 | 0 | 0 | 1 | 0 | 0 | 0 |
| Hap_27 | 0 | 0 | 0 | 0 | 0 | 0 | 0 | 0 | 0 | 0 | 0 | 1 |

**Table S4**The mean suitability of Asian elephants within the study area in South and Southeast Asia.

| **Sl. No.** | **Country and ISO Code** | **Mean Habitat Suitability** |
| --- | --- | --- |
| 1 | Malaysia (MYS) | 0.338154 |
| 2 | Vietnam (VNM) | 0.231971 |
| 3 | Laos (LAO) | 0.256617 |
| 4 | Cambodia (KHM) | 0.352548 |
| 5 | India (IND) | 0.608751 |
| 6 | Thailand (THA) | 0.395147 |
| 7 | Myanmar (MMR) | 0.227204 |
| 8 | Bangladesh (BGD) | 0.194435 |
| 9 | Bhutan (BTN) | 0.170375 |
| 10 | Nepal (NPL) | 0.352093 |
